# Supplementary material
Source: PubMed Central journal article supplement (PMC4670262)
Supplement: NIHMS704862-supplement-306993R1_Acknowledgment_Permissions.pdf [file NIHMS704862-supplement-306993R1_Acknowledgment_Permissions.pdf]

## Circulation Research

---

**From:** Ron Kopito <kopitostanford@gmail.com>  
**Sent:** Thursday, June 25, 2015 1:32 AM  
**To:** circulation.research@circresearch.com  
**Cc:** Chris Glembotski  
**Subject:** permission

This is to certify that Prof. Glembotski has my permission to acknowledge my contribution to the research that he is publishing in circulation research.

Sincerely

Ron Kopito

=====

Ron R. Kopito, Ph.D.  
Professor  
Stanford University  
Department of Biology  
Room 148 Lorry Lokey Building  
337 Campus Drive  
Stanford, CA 94305-5020

tel 650 723-7581  
fax 650-724-9945  
kopito@stanford.edu  
<http://www.stanford.edu/group/kopito/index.html>

Administrative Assistant:  
Tammy Learned  
tlearned@stanford.edu  
Tel 650 725-4845

## Circulation Research

---

**From:** Hajjar, Roger <roger.hajjar@mssm.edu>  
**Sent:** Wednesday, June 24, 2015 3:58 PM  
**To:** circulation.research@circresearch.com  
**Subject:** Re: Circulation Research Paper Acknowledgement

I give permission for this acknowledgment

---

Roger J. Hajjar MD  
Director, Cardiovascular Research Center  
Arthur & Janet Ross Professor of Medicine  
Icahn School of Medicine at Mount Sinai  
One Gustave Levy Place, Box 1030  
New York, NY 10029  
Tel: 212-824-8908  
Fax: 212-241-4080

---

**From:** Chris Glembotski <[cglembotski@mail.sdsu.edu](mailto:cglembotski@mail.sdsu.edu)>  
**Date:** Wednesday, June 24, 2015 at 3:08 PM  
**To:** Roger Hajjar <[roger.hajjar@mssm.edu](mailto:roger.hajjar@mssm.edu)>  
**Cc:** shirin\_doroudgar <[shirin\\_doroudgar@yahoo.com](mailto:shirin_doroudgar@yahoo.com)>  
**Subject:** Circulation Research Paper Acknowledgement

Dear Roger,

I hope this message finds you well.

We acknowledged you in a Circulation Research manuscript that we anticipated to be accepted soon.

As you know, according to journal policy, anyone who was acknowledged must send an e-mail to

[circulation.research@circresearch.com](mailto:circulation.research@circresearch.com)

citing their permission to be acknowledged.

Here is the acknowledgement if you want to see it:

The authors thank Dr. Roger Hajjar (Mount Sinai Hospital) for help with AAV9 generation, Dr. Ron Kopito (Stanford University) for the TCR-a-HA plasmid.

If you could send an e-mail to Circ Res acknowledging our acknowledgement of you, it would be much appreciated.

Please let me know if you have any questions.
